# Supplementary material
Source: Springer Nature journal article supplement (https://www.springermedizin.de/resource/supplementary/13014_2013_864_MOESM3_ESM.pdf/9634302)

# Freedom from Radiation Necrosis

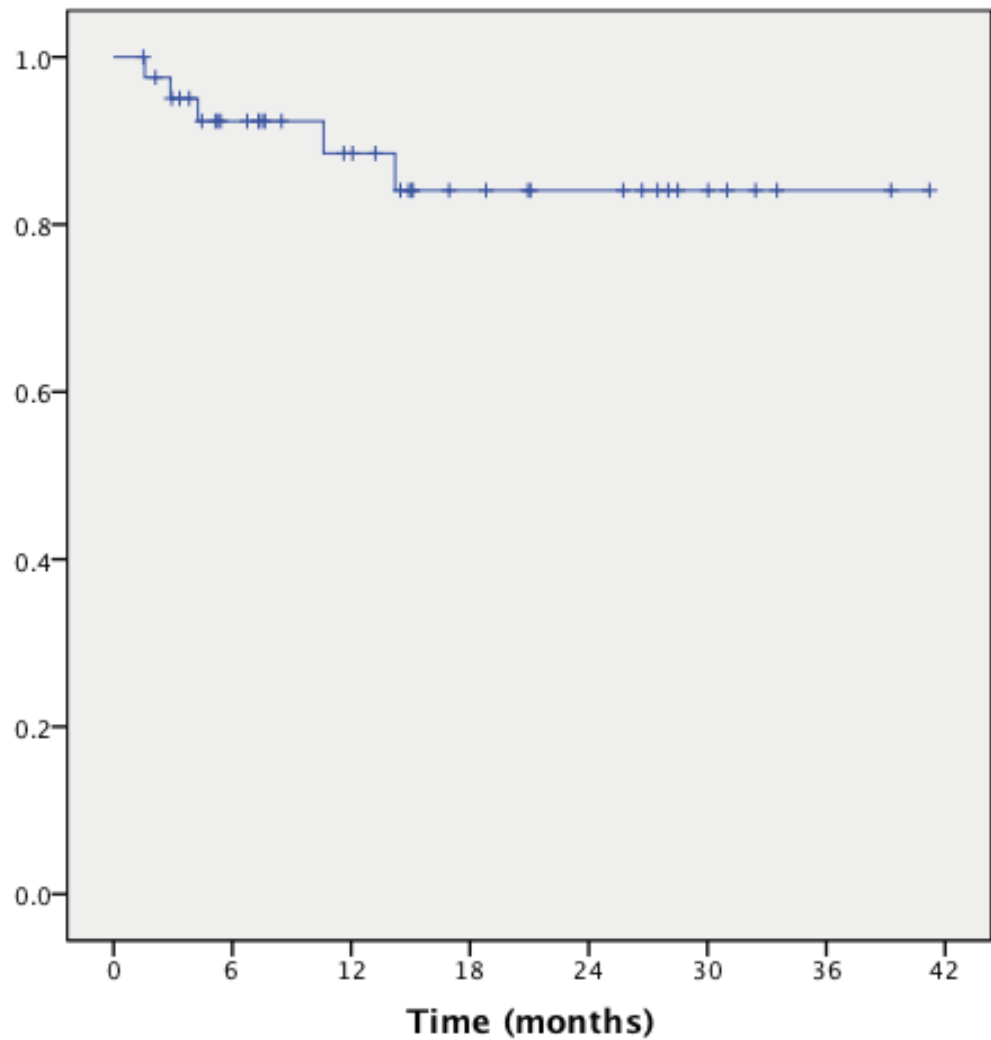

Supplement: MOESM3 [file 9634302]
